# Supplementary material for: Photocatalysis screening for group III–V vdW heterostructures constructed by MX (M = Ga, In and X = P, As) monolayers
Source: Royal Society of Chemistry journal article supplement (doi:10.1039/d3ra01429k), 2023-01-01
Supplement: d3ra01429k1.pdf [file d3ra01429k1.pdf]

ARTICLE

Supporting  
Information

## Photocatalysis screening for group III-V vdW heterostructures constructed by MX (M=Ga, In and X=P, As) monolayers

Yingjie Chen <sup>a</sup>, Baonan Jia <sup>ab,†</sup>, Guoying Qin <sup>a</sup>, Huiyan Zhao <sup>a</sup>, Lihong Han <sup>a</sup>, Pengfei Lu <sup>ac,†</sup>

Received 00th January 20xx,  
Accepted 00th January 20xx

DOI: 10.1039/x0xx00000x

To harvest solar energy for water splitting and produce pollution-free hydrogen and oxygen, high-performance photocatalysts are essential. Here, by combining different two-dimensional (2D) group III-V MX (M = Ga, In and X = P, As) monolayers, we designed 144 van der Waals (vdW) heterostructures to identify efficient photoelectrochemical materials. Using first-principles calculations, we investigated the stabilities, electronic properties, and optical properties of these heterostructures. After a careful screening process, we elected GaP/InP in a BB-II stacking configuration as the most promising candidate. This specific GaP/InP configuration has a type-II band alignment with a gap value of 1.83 eV. The conduction band minimum (CBM) is located at -4.276 eV, and the valence band maximum (VBM) is located at -6.217 eV, fully satisfying the requirements of the catalytic reaction under pH=0. Additionally, light absorption has been improved through the construction of the vdW heterostructure. These results could help in understanding the properties of the III-V heterostructures and guide the experimental synthesis of these materials for photocatalysis applications.

<sup>a</sup> State Key Laboratory of Information Photonics and Optical Communications, Beijing University of Posts and Telecommunications, Beijing 100876, China.

<sup>b</sup> School of Electronic Engineering, Beijing University of Posts and Telecommunications, Beijing 100876, China.

<sup>c</sup> School of Integrated Circuits, Beijing University of Posts and Telecommunications, Beijing 100876, China.

† jiabaonan@163.com (B.N. Jia), photon.bupt@gmail.com (P.F. Lu).

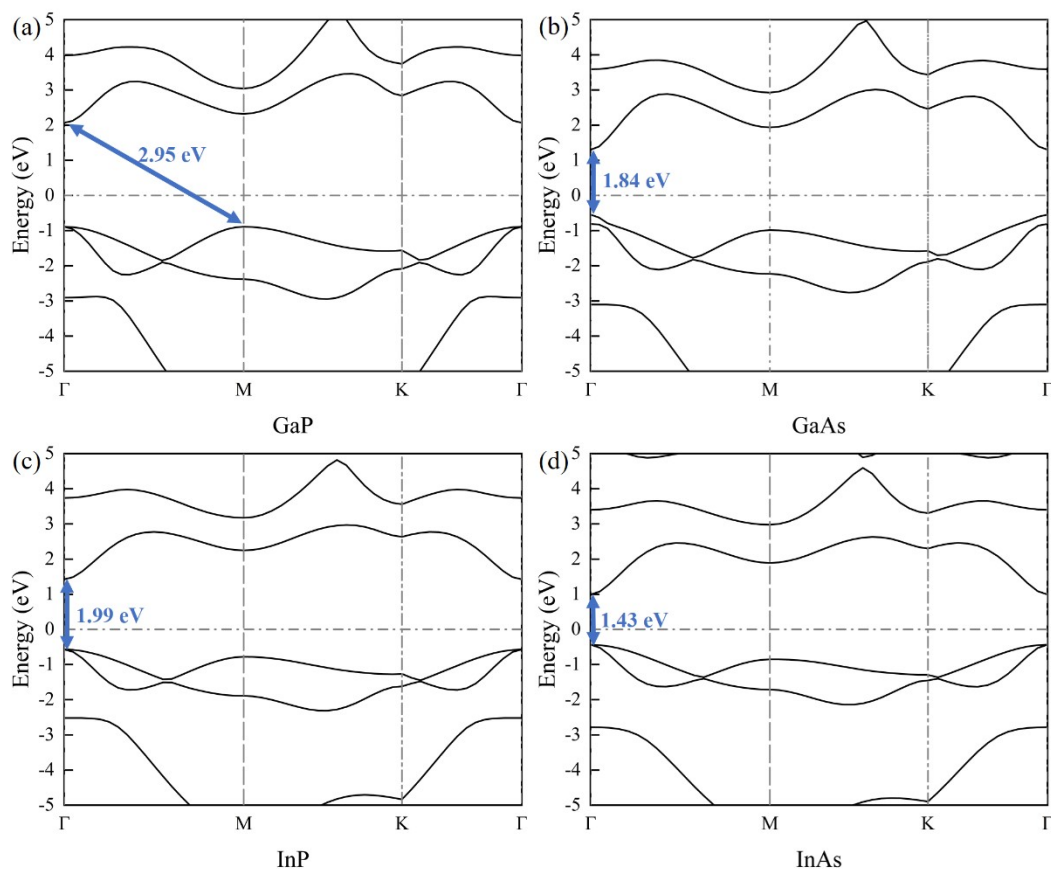

**Figure S1** The HSE06 band structures of (a) GaP, (b) GaAs, (c) InP, and (d) InAs monolayer.

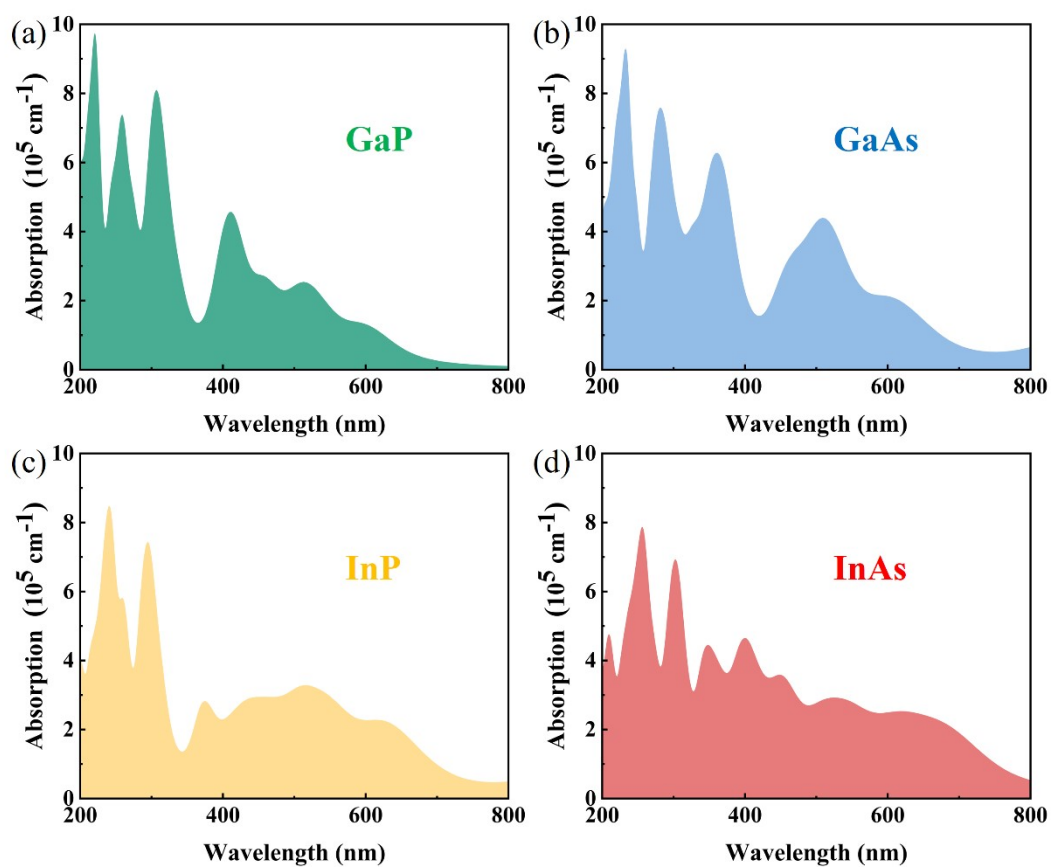

**Figure S2** The absorption coefficient  $\alpha$  of (a) GaP, (b) GaAs, (c) InP, and (d) InAs monolayer.

**Table S1** The lattice constant difference between the top and the bottom layer  $\Delta a$  (Å), the ratio  $\Delta a/a_{\text{bottom}}$  (%) and  $\Delta a/a_{\text{top}}$  (%).

| System    | $\Delta a$ (Å) | $\Delta a/a_{\text{bottom}}$ (%) | $\Delta a/a_{\text{top}}$ (%) |
|-----------|----------------|----------------------------------|-------------------------------|
| GaP/GaAs  | 0.1415         | 3.609                            | 3.483                         |
| GaP/InP   | 0.3258         | 8.310                            | 7.672                         |
| GaP/InAs  | 0.4558         | 11.626                           | 10.415                        |
| GaAs/InP  | 0.1843         | 4.537                            | 4.340                         |
| GaAs/InAs | 0.3142         | 7.735                            | 7.180                         |
| InP/InAs  | 0.1299         | 3.059                            | 2.968                         |

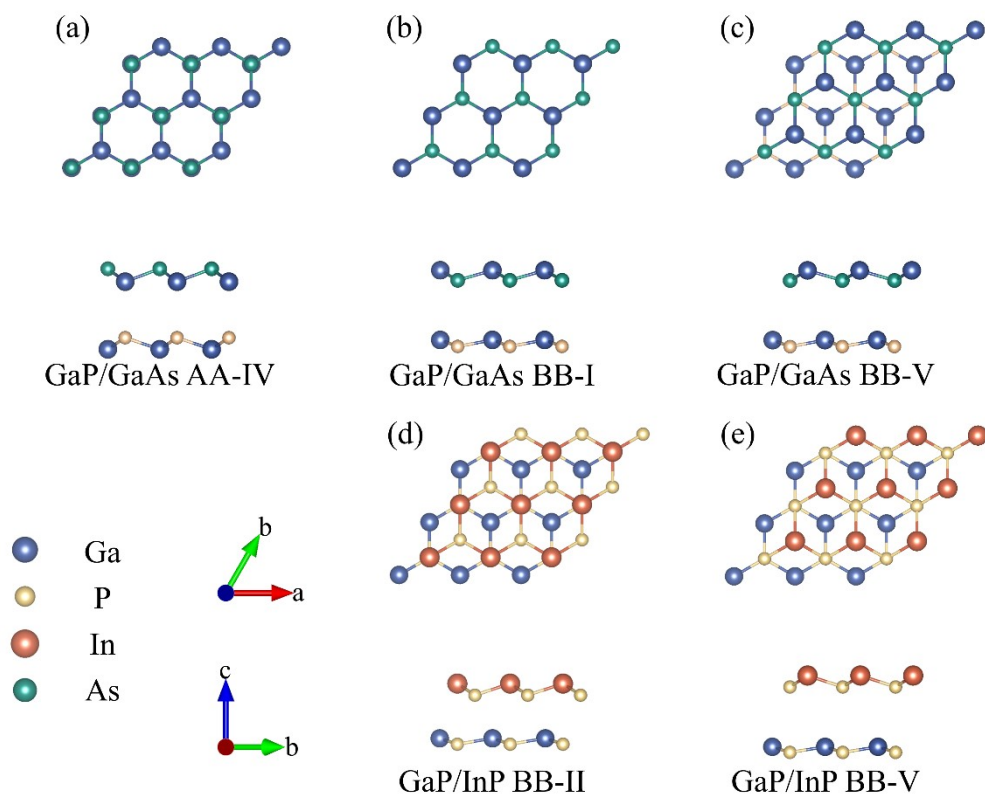

**Figure S3** The side and top views of the five selected configurations: (a) GaP/GaAs (stacking AA-IV), (b) GaP/GaAs (stacking BB-I), (c) GaP/GaAs (stacking BB-V), (d) GaP/InP (stacking BB-II), and (e) GaP/InP (stacking BB-V).
